# Supplementary material
Source: PubMed Central journal article supplement (PMC3264295)
Supplement: supp_80.2.778_IAI5570-11_SF1-SF2.pdf [file supp_80.2.778_IAI5570-11_SF1-SF2.pdf]

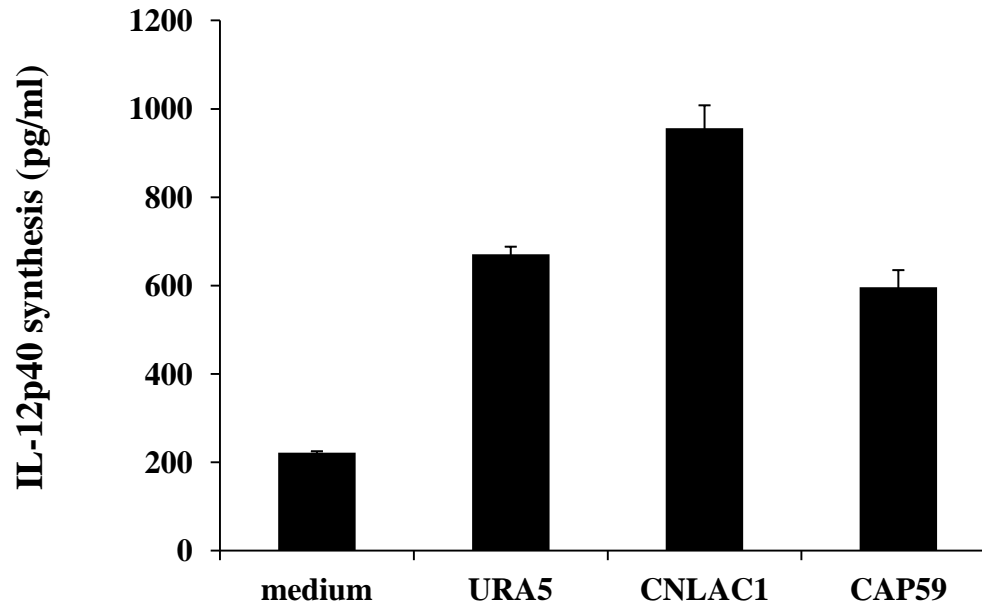

**Supplementary Figure 1. Activation of BM-DCs by CNLAC1 and CAP59 from *C. neoformans*** *CNLAC1* and *CAP59* DNA fragments (345 and 343 bp, respectively) were amplified from Cap67 DNA by PCR using the specific primers 5'- CTGCACAGCTA CTGGTTCCTC-3' (forward) and 5'- CCCGTATACCTCACCACC-3' (reverse) for *CNLAC1* and 5'- CCTCCTCAACTCATCAGCACCC -3' (forward) and 5'- GTGGTAGCCCAAGATGGCA -3' (reverse) for *CAP59*. Each DNA fragment was amplified for 28 cycles, each consisting of 10 sec at 93°C, 30 sec at 63°C and 30 sec at 72°C, and the PCR products were purified using a QIAquick® PCR Purification Kit (QIAGEN). BM-DCs were cultured with PCR products of *URA5*, *CNLAC1* and *CAP59* from Cap67 (10 µg/ml) for 24 h, and IL-12p40 concentration in the culture supernatants was measured by ELISA. Both *CNLAC1* and *CAP59* induced IL-12p40 production by BM-DCs, as *URA5* did.

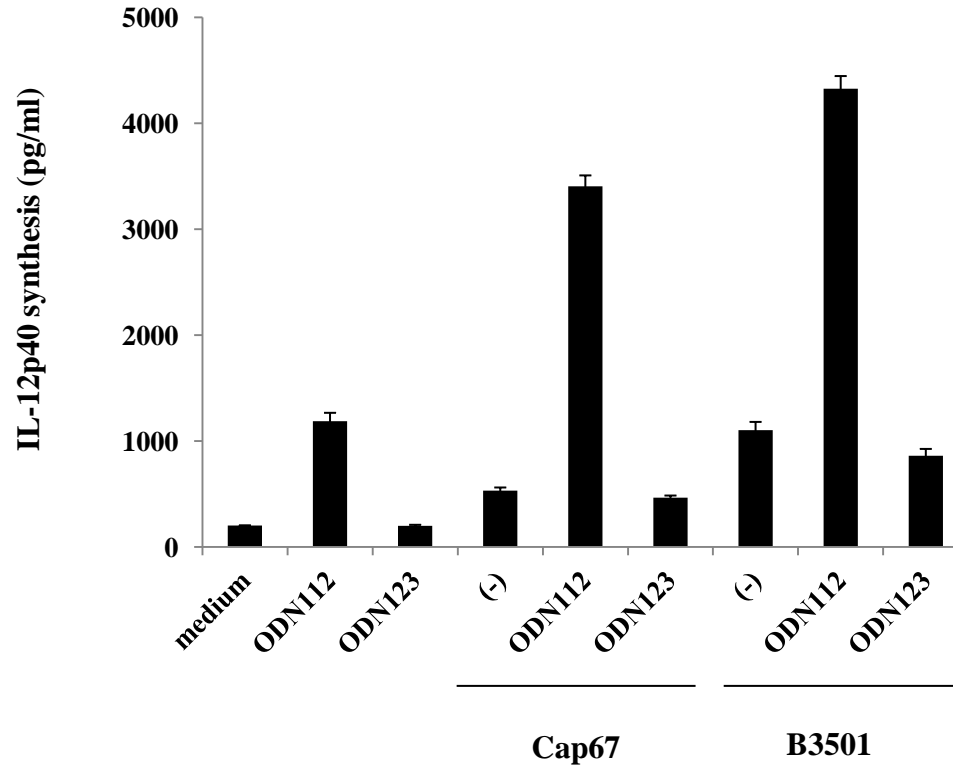

**Supplementary Figure 2. Effect of ODNs on IL-12p40 production by BM-DCs stimulated with *C. neoformans*** BM-DCs were cultured with ODN112 (30  $\mu\text{g/ml}$ ) or ODN123 (30  $\mu\text{g/ml}$ ) in the presence or absence of *C. neoformans* (Cap67 or B3501, encapsulated parent strain of Cap67) at MOI3 for 24 h, and IL-12p40 concentration in the culture supernatants was measured by ELISA. ODN112 synergistically enhanced IL-12p40 production by BM-DCs stimulated with *C. neoformans*, whereas ODN123 did not have this effect.
